# Supplementary material
Source: publisher figshare collection journal article supplement (https://acs.figshare.com/ndownloader/files/3881326)
Supplement: Supplementary file 1 [file 3881326]

## Supporting Information

### Alkaline Stability of Benzyl Trimethyl Ammonium Functionalized Polyaromatics: A Computational and Experimental Study

Yoong-Kee Choe,<sup>†</sup> Cy Fujimoto,<sup>‡</sup> Kwan-Soo Lee,<sup>§</sup> Luke T. Dalton,<sup>#</sup> Kathy Ayers,<sup>#</sup> Neil J. Henson,<sup>⊥</sup> and Yu Seung Kim<sup>§,\*</sup>

<sup>†</sup> National Institute of Advanced Industrial Science & Technology, Tsukuba 305-8568, Japan

<sup>‡</sup> Organic Materials Science, Sandia National Laboratory, Albuquerque, New Mexico 87185, United States

<sup>§</sup> Sensors and Electrochemical Devices Group, Los Alamos National Laboratory, Los Alamos, New Mexico 87545 United States

<sup>#</sup> Proton OnSite, Wallingford, Connecticut 06492, United States

<sup>⊥</sup> Physics and Chemistry of Materials, Los Alamos National Laboratory, Los Alamos, New Mexico 87545, United States

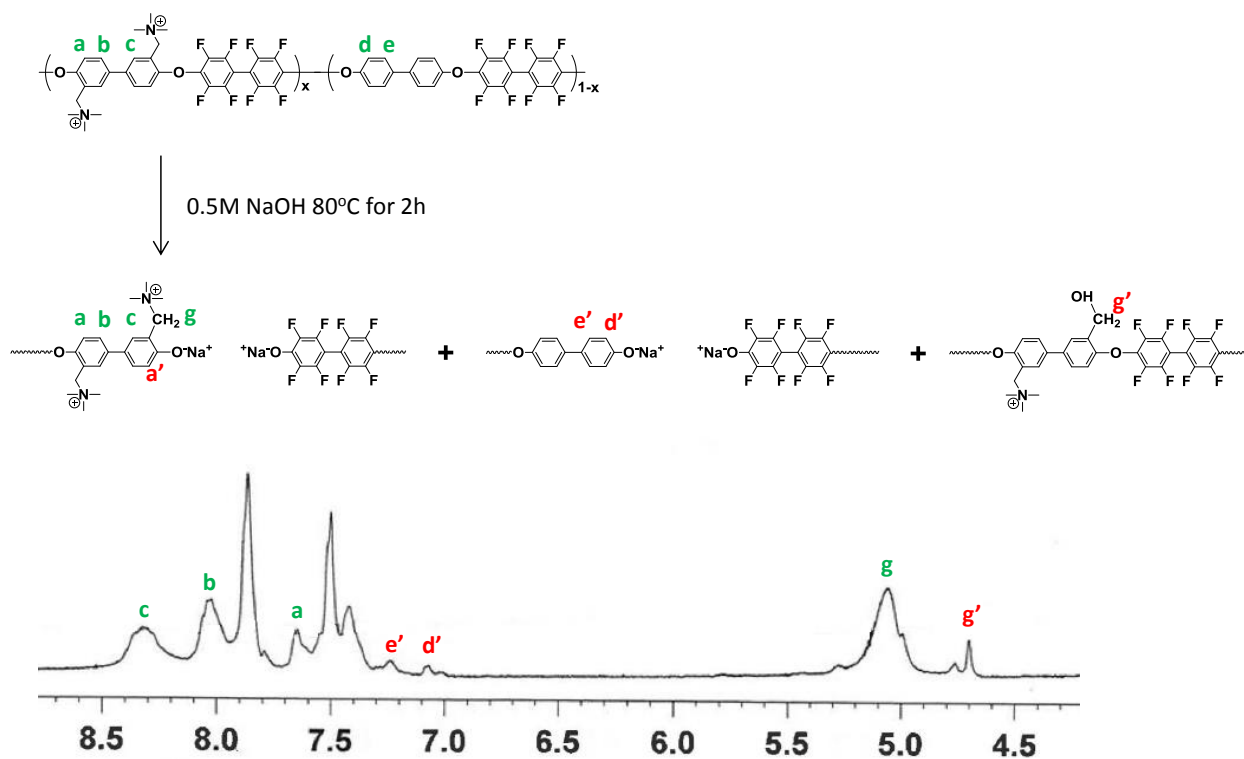

**Figure S1.** <sup>1</sup>H NMR spectra of F-PAE after stability test in 0.5 M NaOH at 80°C for 2 h. The degradation % of cationic functional group was obtained by the peak integration of  $g'/(g+g')$

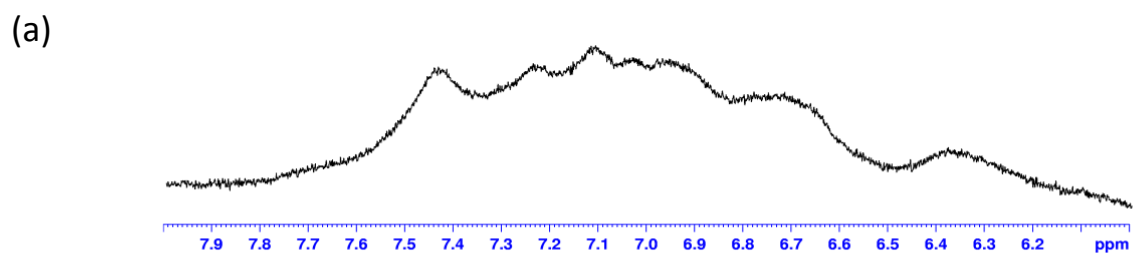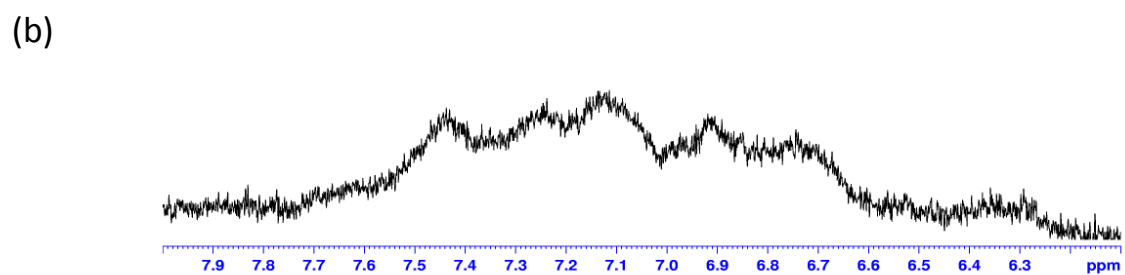

**Figure S2.**  $^1\text{H}$  NMR spectra of ATM-PP (a) before and (b) after stability test in 0.5 M NaOH at 80°C for 2 h.

(a)

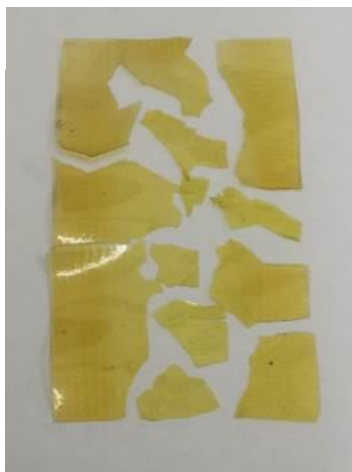

(b)

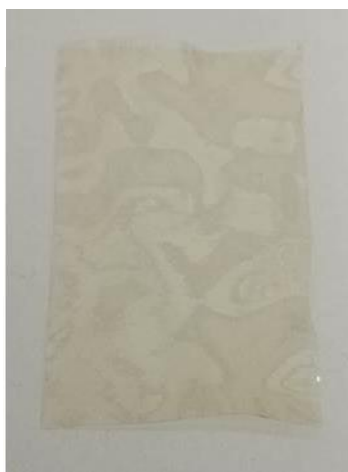

**Figure S3.** Photographs of (a) F-PAE and (b) ATM-PP after stability test in 0.5 M NaOH at 80°C for 2 h.
